# Supplementary material for: History and origin of the HIV-1 subtype C epidemic in South Africa and the greater southern African region
Source: PubMed Central journal article supplement (PMC4648088; doi:10.1038/srep16897), 2015-11-17

## **Supplementary information**

### **History and origin of the HIV-1 subtype C epidemic in South Africa and the greater southern African region**

E Wilkinson, S Engelbrecht, T de Oliveira

#### **Table of content**

|                        | Page |
|------------------------|------|
| Supplementary Table 1  | 2    |
| Supplementary Figure 1 | 3    |
| Supplementary Figure 2 | 4    |

**Supplementary Table 1:** Contribution of foreign migrant labourers per country working in South Africa gold mines between 1920 and 1990.

| Year | Angola | Botswana | Lesotho | Malawi | Mozambique | Swaziland | Tanzania | Zambia | Zimbabwe | Other | Total  |
|------|--------|----------|---------|--------|------------|-----------|----------|--------|----------|-------|--------|
| 1920 | 0      | 2112     | 10439   | 354    | 77921      | 3449      | 0        | 12     | 179      | 5484  | 99950  |
| 1925 | 0      | 2547     | 14256   | 136    | 73210      | 3999      | 0        | 4      | 68       | 14    | 94234  |
| 1930 | 0      | 3151     | 22306   | 0      | 77828      | 4345      | 183      | 0      | 44       | 5     | 107862 |
| 1935 | 0      | 7505     | 34788   | 49     | 62576      | 6865      | 109      | 570    | 27       | 9     | 112498 |
| 1940 | 698    | 14427    | 52044   | 8037   | 74693      | 7152      | 0        | 2725   | 8112     | 70    | 167958 |
| 1945 | 8711   | 10102    | 36414   | 4973   | 78588      | 5688      | 1461     | 27     | 8301     | 4732  | 158997 |
| 1950 | 9767   | 12390    | 34467   | 7831   | 86246      | 6619      | 5495     | 3102   | 2073     | 4826  | 172816 |
| 1955 | 8801   | 14195    | 36332   | 12407  | 99449      | 6682      | 8758     | 3849   | 162      | 2299  | 192934 |
| 1960 | 12364  | 21404    | 48842   | 21934  | 101733     | 6623      | 14025    | 5292   | 747      | 844   | 233808 |
| 1965 | 11169  | 23630    | 54819   | 38580  | 89191      | 5580      | 404      | 5898   | 653      | 2686  | 232610 |
| 1970 | 4125   | 20461    | 63988   | 78492  | 93203      | 6269      | 0        | 0      | 3        | 972   | 267513 |
| 1975 | 3431   | 20291    | 78114   | 27904  | 97216      | 8391      | 0        | 0      | 2485     | 12    | 237844 |
| 1980 | 5      | 17763    | 96309   | 13569  | 39539      | 8090      | 0        | 0      | 5770     | 1404  | 182449 |
| 1985 | 0      | 18079    | 97639   | 16849  | 50126      | 12365     | 0        | 0      | 0        | 4     | 195062 |
| 1990 | 0      | 15720    | 108780  | 72     | 50104      | 17816     | 0        | 0      | 2        | 0     | 192494 |

**Supplementary Figure 1:** Dynamics growth of the southern African and South African HIV-1 subtype C epidemics inferred from selected Bayesian SkyRide runs. On the top are the BSP reconstructions from *gag* p24 sequence data and at the bottom are the BSP reconstructions from *pol* sequence data. Blue graphs represent sequence data from the entire southern African region while red graphs represents data containing only South African isolates. Solid lines depict the mean estimated  $N_e$  through time while shaded areas correspond to the 95% highest posterior density intervals.

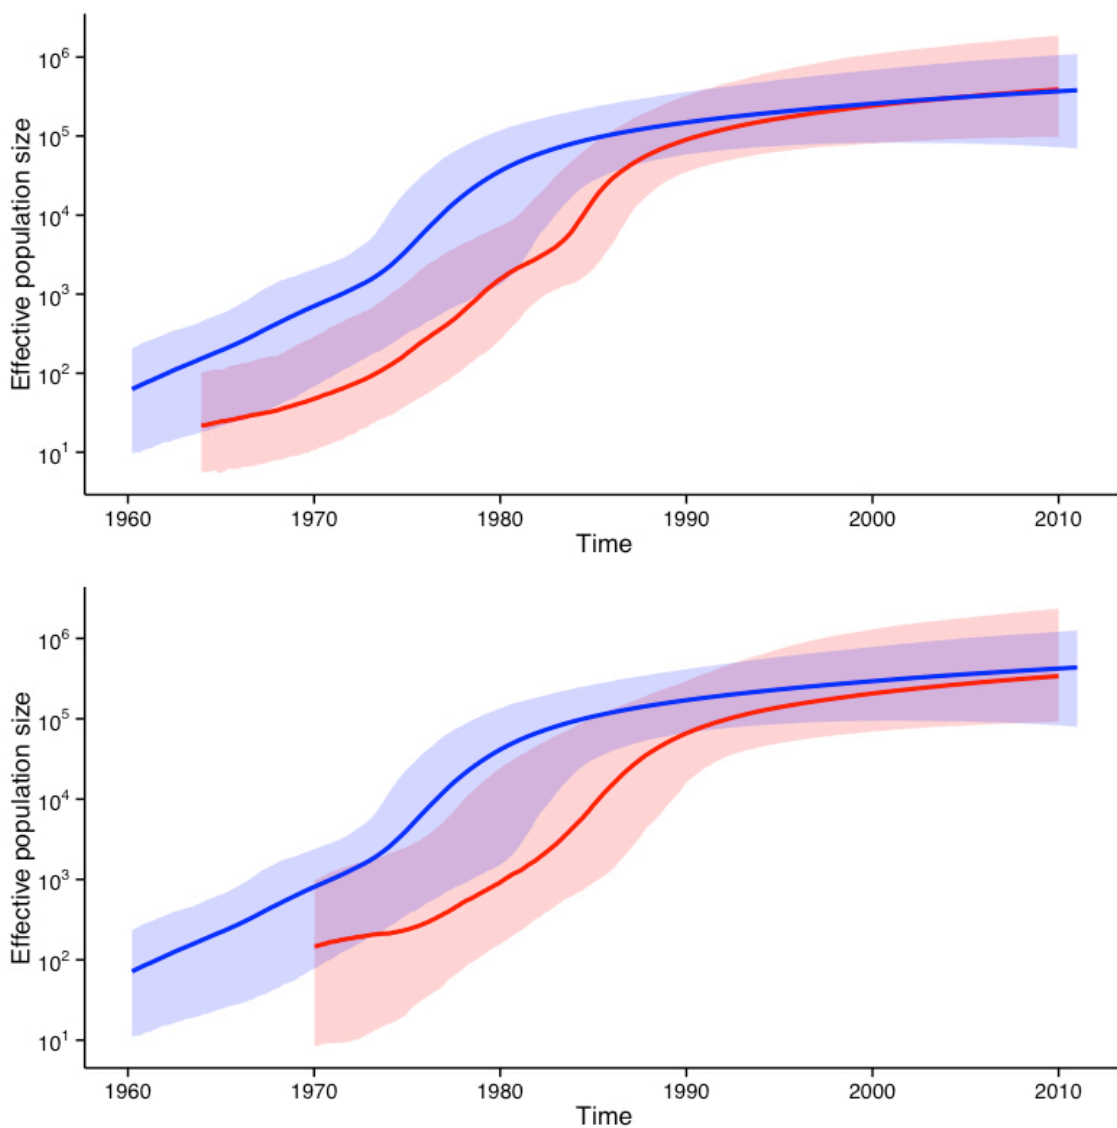

**Supplementary Figure 2:** Dynamics growth of the southern African and South African HIV-1 subtype C epidemics inferred from selected Bayesian SkyGrid runs. On the top are the BSP reconstructions from *gag* p24 sequence data and at the bottom are the BSP reconstructions from *pol* sequence data. Blue graphs represent sequence data from the entire southern African region while red graphs represents data containing only South African isolates. Solid lines depict the mean estimated  $N_e$  through time while shaded areas correspond to the 95% highest posterior density intervals.

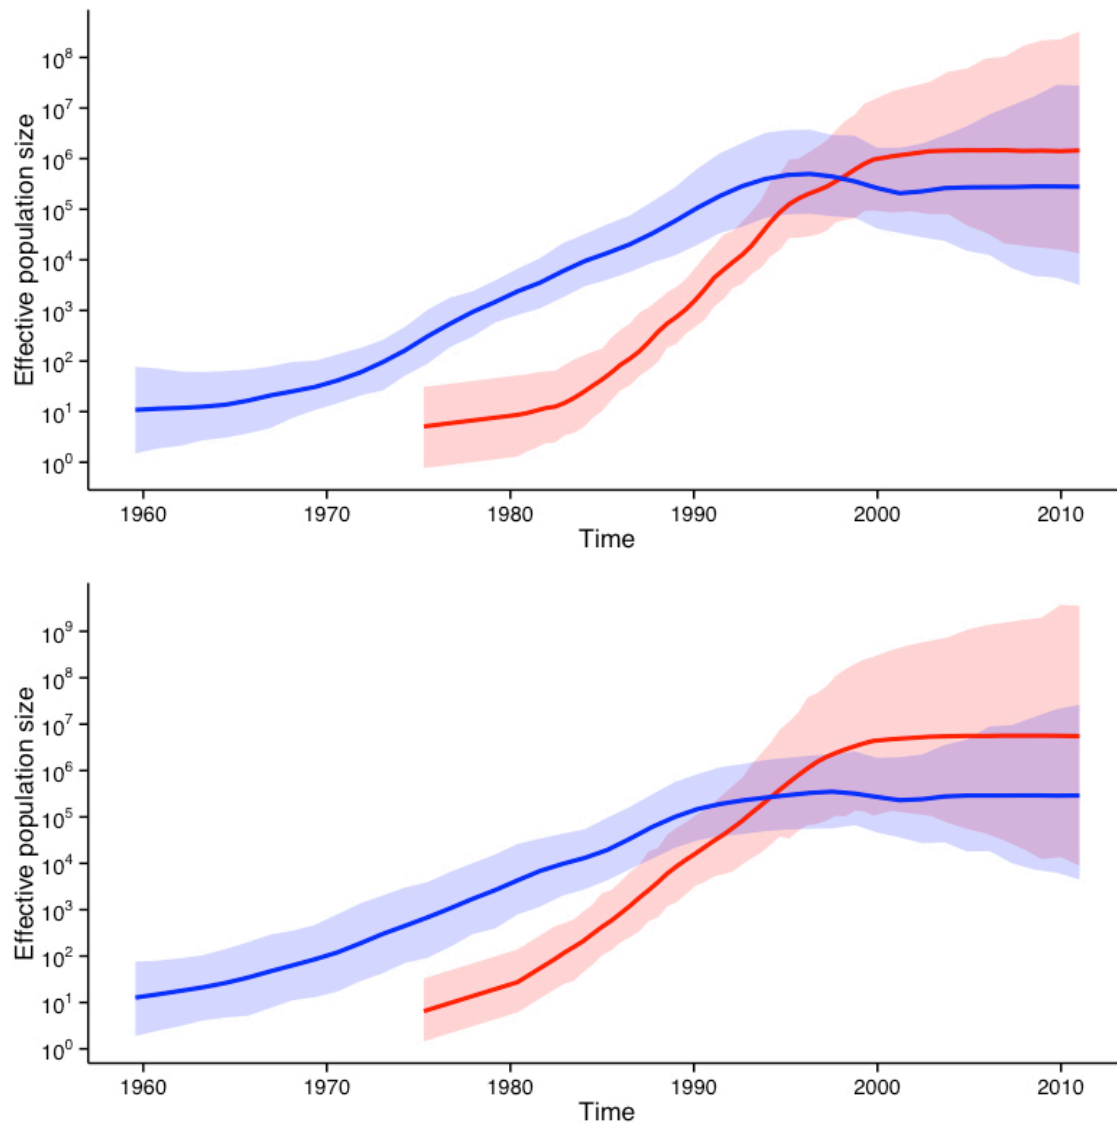

Supplement: srep16897-s1.pdf [file srep16897-s1.pdf]
